# Supplementary material
Source: publisher figshare collection journal article supplement (https://frontiersin.figshare.com/ndownloader/files/24161720)
Supplement: Supplementary file 1 [file 24161720]

## *Supplementary Material*

### **1 Supplementary Figures and Tables**

#### **1.1 Supplementary Figures**

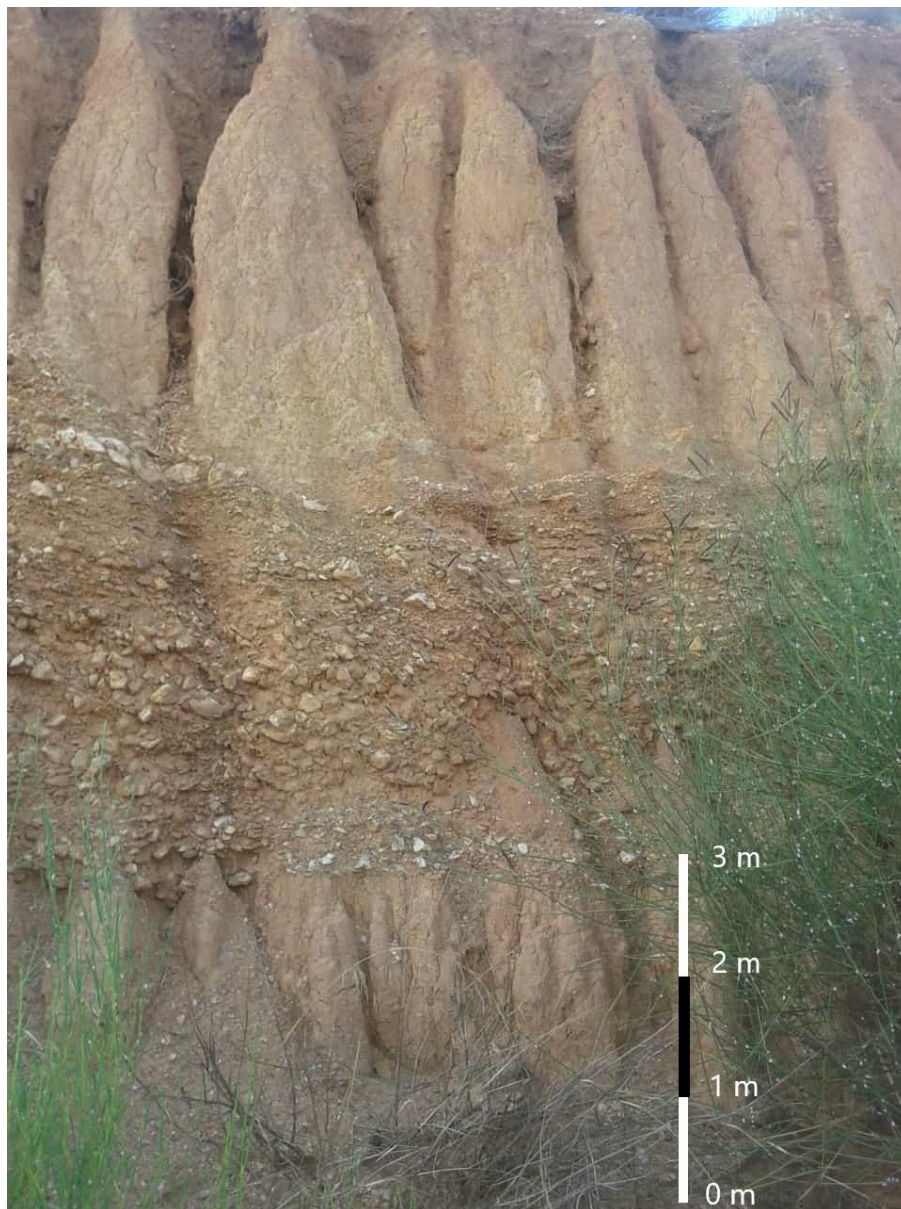

**Supplementary Figure 1.** Upper and lower MP palaeosols separated by a gravelly level.

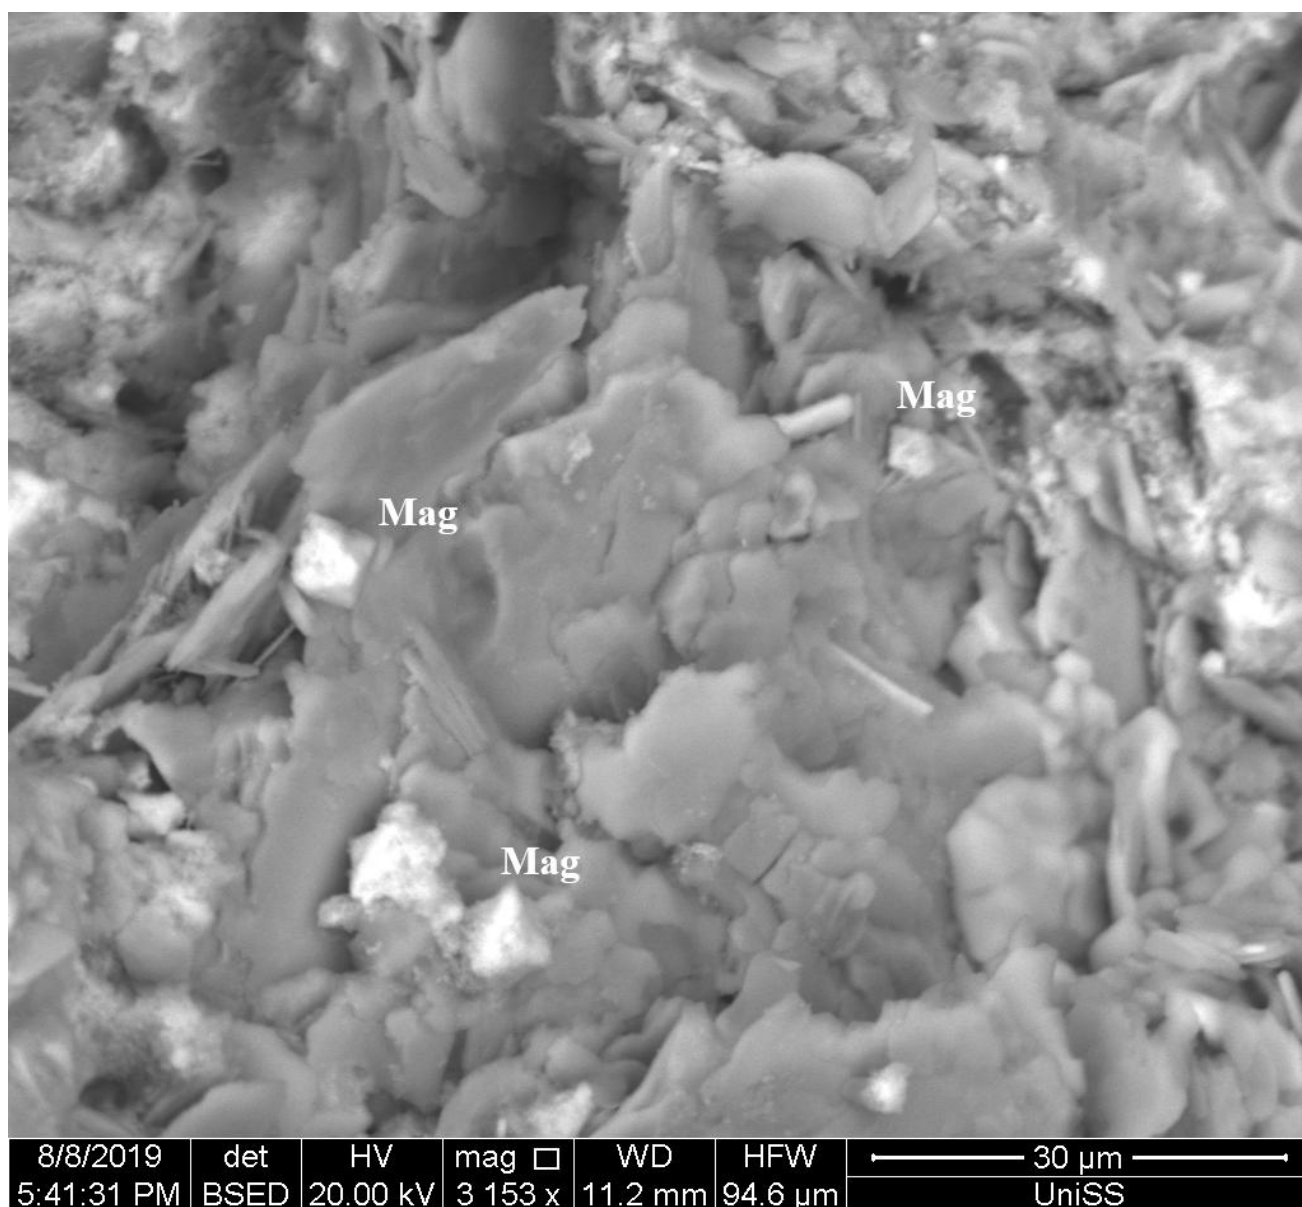

**Supplementary Figure 2.** SEM image of tiny bipyramidal crystals magnetite in MP1 sample.

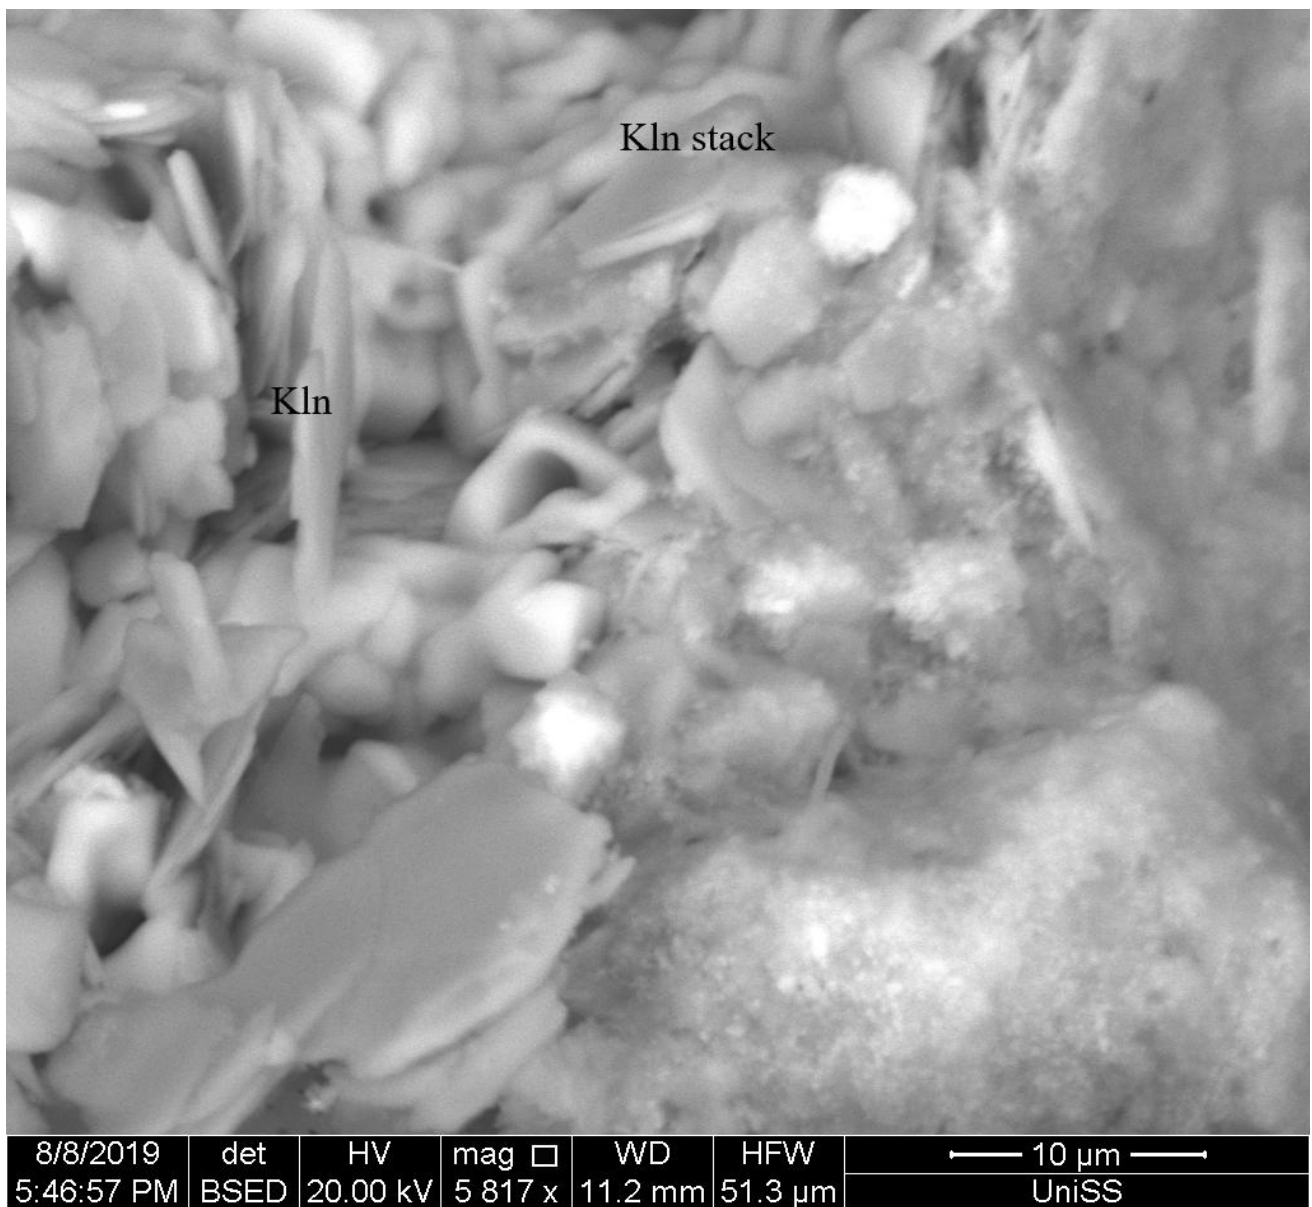

**Supplementary Figure 3.** SEM image of Kaolinite crystals.

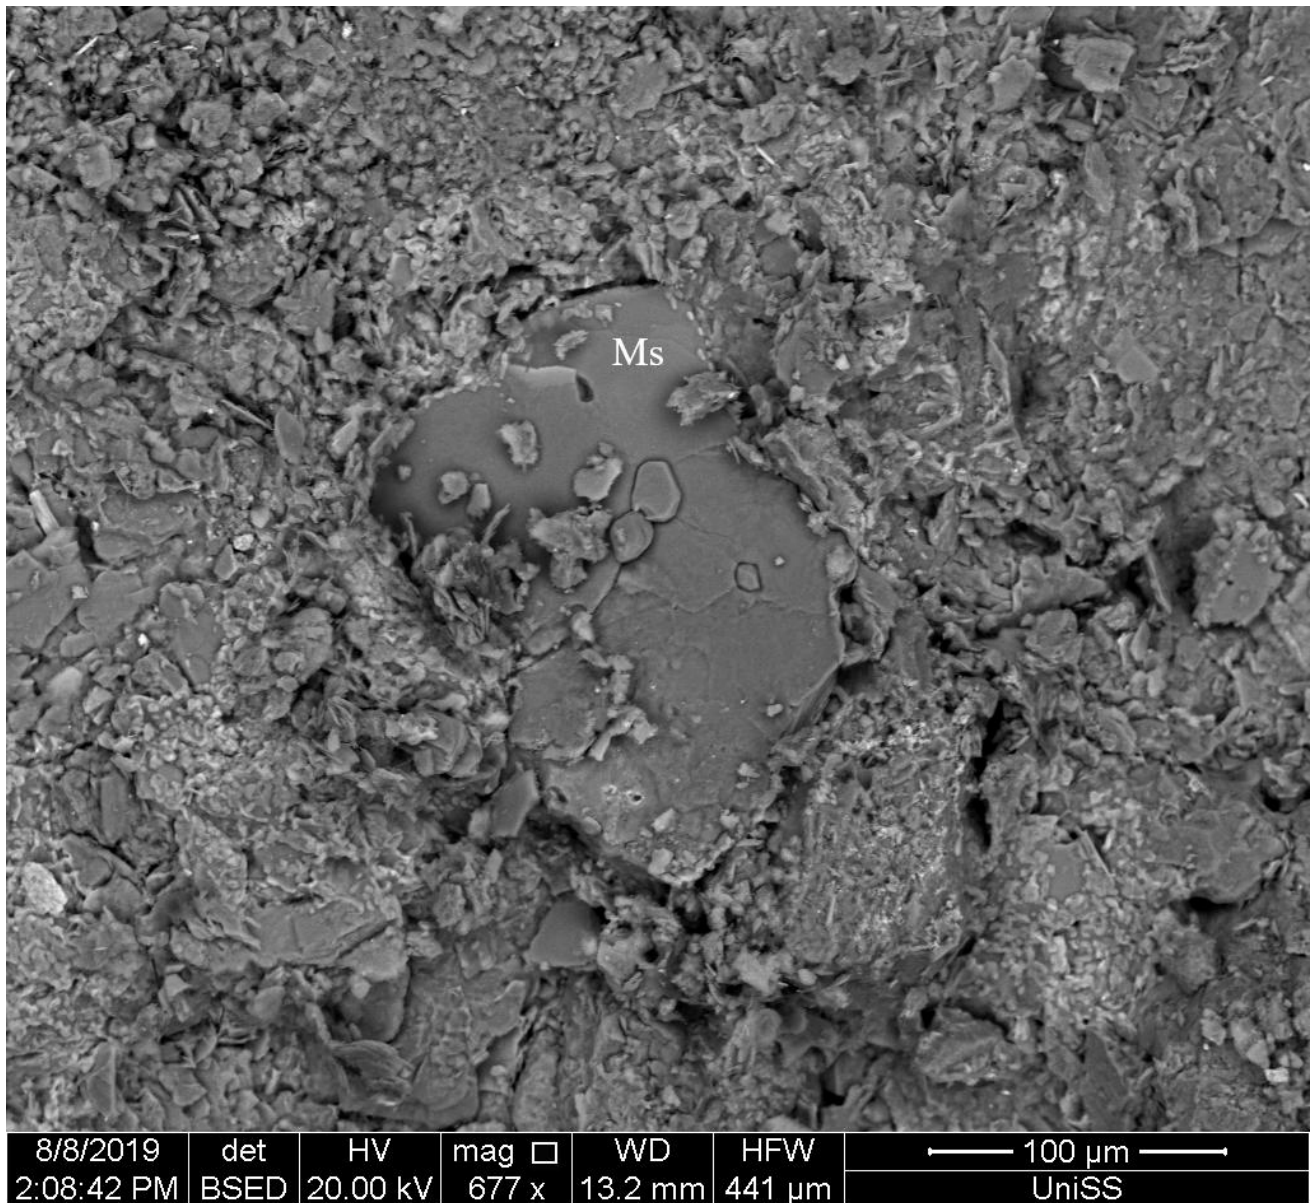

**Supplementary Figure 4.** SEM image of detrital muscovite laminae within the upper Messinian palaeosol. Notice the growing exagonal crystal of kaolinite on the muscovite clast.

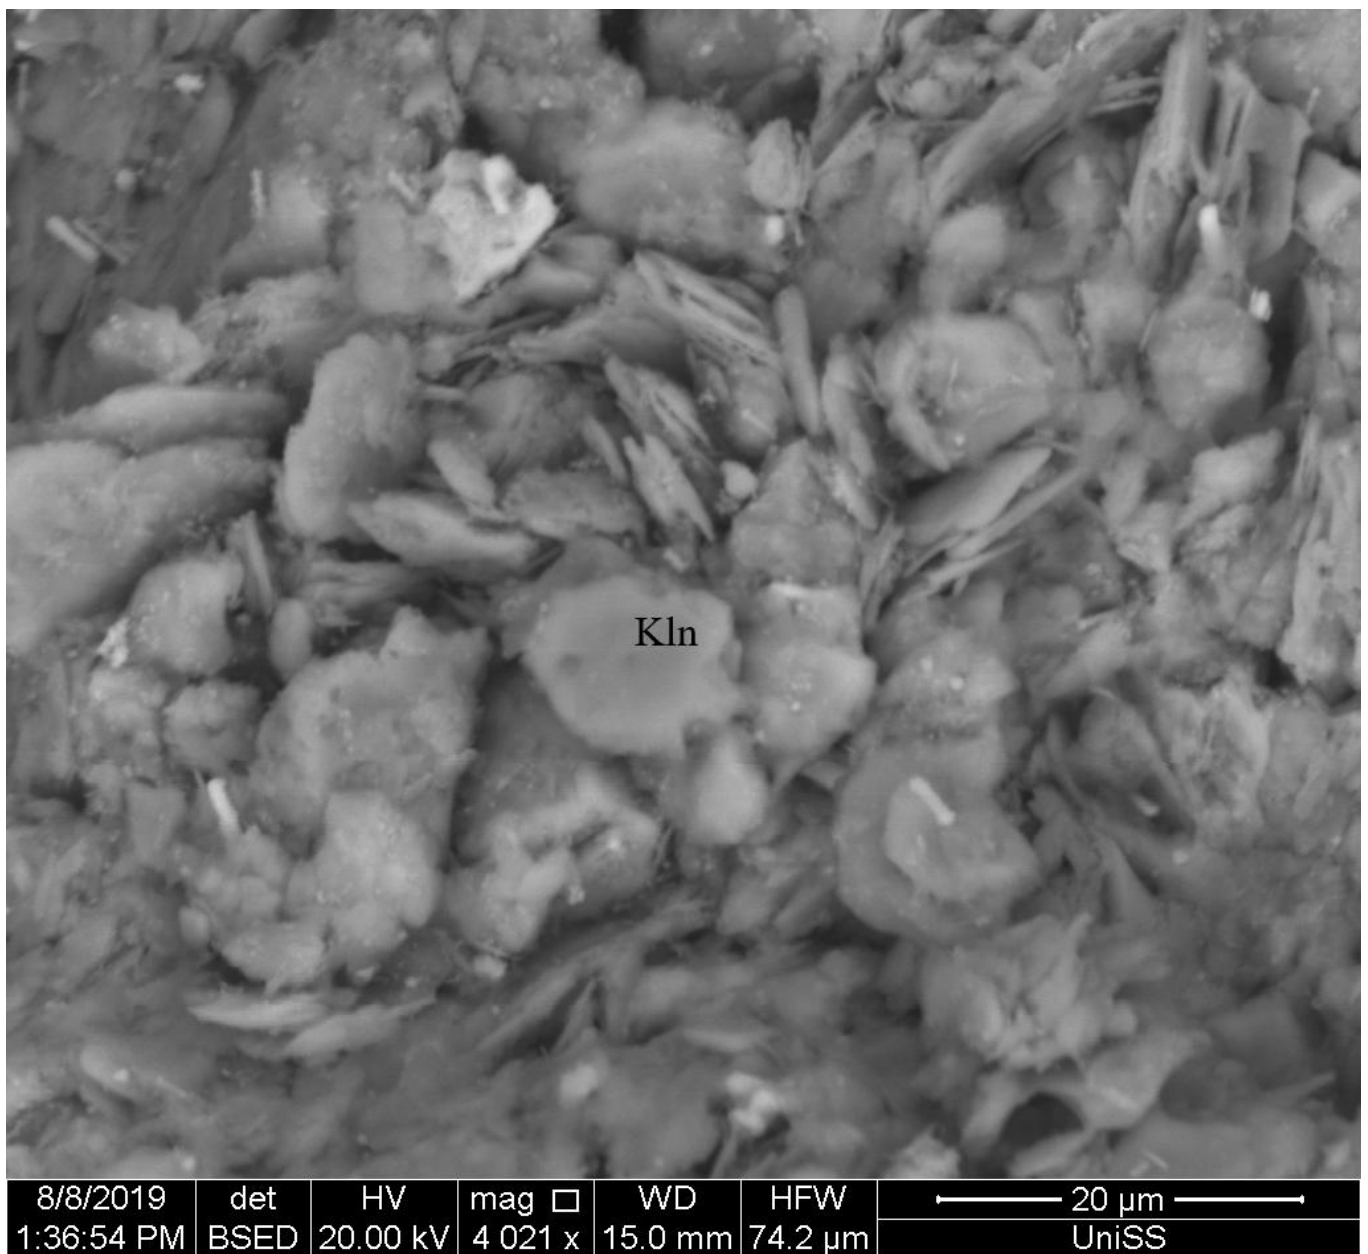

**Supplementary Figure 5.** SEM image of detrital kaolinite in the Cretaceous clays.

## 1.2 Supplementary Tables

**Supplementary Table 1.**

XRPD mineral composition of CP and MP samples with semiquantitative interpretations.

| Sample | Kln | Ilt | Mnt | Plg | Qz  | Fsp | Cal | Rt | Ant | Hem | Gth | Gbs | Bhm | HI |
|--------|-----|-----|-----|-----|-----|-----|-----|----|-----|-----|-----|-----|-----|----|
| CP01   | xxx | x   |     |     | x   |     |     | tr | x   |     |     |     | tr  |    |
| CP02   | xxx | tr  |     |     | tr  |     | xx  |    |     |     |     |     | x   |    |
| CP03   | x   | x   | tr  |     | x   |     |     | x  |     |     |     |     |     |    |
| CP04   | x   |     | tr  |     |     |     | x   |    |     |     | x   |     | x   |    |
| CP05   | x   | x   | tr  |     |     |     |     |    |     | x   | x   |     |     |    |
| CP06   | xx  | xx  |     |     | x   |     |     | x  | x   |     | x   |     |     |    |
| CP07   | x   | x   |     |     |     |     |     | x  | x   | x   | x   |     |     |    |
| CP08   |     |     |     |     |     |     |     |    |     |     |     |     |     |    |
| CP09   | x   | x   |     |     | x   |     |     | x  | x   |     | x   | x   | x   |    |
| CP10   | x   | x   |     |     |     |     |     | x  | x   | x   | x   | x   |     |    |
| CP11   | x   | x   |     |     | x   |     |     | x  | x   |     | x   |     |     |    |
| CP12   | x   | x   |     |     |     |     | x   | x  | x   |     | x   |     |     |    |
| MP01   | xx  | xxx |     |     | xx  |     |     | x  |     |     | tr  | tr  |     |    |
| MP02   | xx  | xxx |     |     | xxx |     |     | x  |     |     | tr  | tr  |     |    |
| MP03   | xx  | xxx |     |     | xx  |     |     | x  | tr  |     | x   | tr  |     |    |
| MP04   | xx  | xx  |     |     | xxx |     |     | x  |     |     | x   | tr  |     |    |
| MP05   | x   | xx  |     |     | xxx |     |     | x  |     |     | x   | tr  |     | tr |
| MP06   | x   | xx  |     |     | xxx |     |     | tr |     |     | tr  | tr  |     |    |
| MP07   | x   | x   |     |     | xxx | x   |     | tr | tr  |     | x   |     |     |    |
| MP08   | x   | xx  |     |     | xxx |     |     | x  |     |     | x   | tr  |     | tr |
| MP09   | x   | x   |     |     | xxx |     |     | x  | x   |     |     |     |     |    |
| MP10   | x   | xx  |     |     | xxx |     |     | x  |     |     | tr  | tr  |     |    |
| MP11   | xx  | xxx |     |     | xxx |     |     | tr |     |     | x   | tr  |     |    |
| MP12   | x   | xx  |     |     | xxx |     |     | tr |     |     | x   | tr  |     |    |
| MP13   | x   | x   |     | tr  | xxx | x   |     | tr |     |     | x   |     |     |    |
| MP14   | x   | x   |     | tr  | xxx | x   |     | tr |     |     | x   |     |     |    |
| MP15   | x   | xx  |     |     | xxx |     |     | x  |     |     | x   |     |     |    |
| MP16   | ?   | tr  |     |     | xxx |     |     |    |     |     | x   |     |     |    |
| MP17   | x   | xx  |     |     | xxx |     |     | x  |     |     |     |     |     |    |
| MP18   | x   | xx  |     |     | xxx |     |     | x  |     |     | ?   |     |     | tr |
| MP19   | x   | xxx |     |     | xxx | x   |     |    |     |     | x   | x   |     | tr |
| MP20   | ?   | tr  |     | x   | xxx | x   |     | ?  |     |     | x   |     |     |    |
| MP21   |     | tr  |     |     | xxx | x   |     |    |     | x   |     |     |     |    |
| MP22   | x   | x   |     |     | xxx |     |     |    |     |     |     |     |     |    |

Legend. Kln: Kaolinite; Ilt: Illite; Mnt: Montmorillonite; Plg: Palygorskite; Qz: Quartz; Fsp: Feldspar; Cal: Calcite; Rt: Rutile; Ant: Anatase; Hem: Hematite; Gth: Goethite; Gbs: Gibbsite; Bhm: Boehmite; HI: Halite; tr: trace; x: low abundance; xx: moderate abundance; xxx: high abundance.

## Supplementary Table 2.

### Cretaceous Factor Analysis

|                                    | Al <sub>2</sub> O <sub>3</sub> | Fe <sub>2</sub> O <sub>3</sub> (T) | Sc     | V   | Cr     | Ni          | Ga            | La           | Ce   | Yb   | Th   |
|------------------------------------|--------------------------------|------------------------------------|--------|-----|--------|-------------|---------------|--------------|------|------|------|
| CP01                               | 3164                           | 13.64                              | 33     | 342 | 190    | 89          | 38            | 46.2         | 207  | 6.4  | 215  |
| CP02                               | 27                             | 17.24                              | 27     | 442 | 140    | 265         | 29            | 227          | 185  | 9    | 23   |
| CP03                               | 29.43                          | 17.18                              | 33     | 407 | 230    | 168         | 30            | 392          | 463  | 10.4 | 27.2 |
| CP04                               | 28.07                          | 15.14                              | 45     | 310 | 300    | 103         | 38            | 66.1         | 205  | 8.3  | 26.8 |
| CP05                               | 29.02                          | 15.3                               | 36     | 331 | 220    | 167         | 32            | 118          | 251  | 10.8 | 25.6 |
| CP06                               | 26.73                          | 11.56                              | 29     | 250 | 180    | 165         | 42            | 124          | 670  | 10.9 | 21   |
| CP07                               | 25.59                          | 12.54                              | 28     | 272 | 180    | 246         | 38            | 212          | 156  | 9.5  | 16.6 |
| CP08                               | 27.85                          | 9.62                               | 26     | 195 | 130    | 98          | 36            | 60.4         | 90.4 | 8.4  | 20.1 |
| CP09                               | 25.18                          | 10.51                              | 29     | 213 | 170    | 150         | 38            | 316          | 208  | 12.9 | 19.1 |
| CP10                               | 24.32                          | 12.33                              | 28     | 298 | 170    | 211         | 40            | 324          | 188  | 13   | 21.1 |
| CP11                               | 25.49                          | 10.25                              | 27     | 197 | 160    | 122         | 32            | 184          | 108  | 7.4  | 17.5 |
| CP12                               | 23.44                          | 7.9                                | 24     | 209 | 200    | 179         | 35            | 79.3         | 108  | 7    | 19.6 |
|                                    |                                |                                    |        |     |        |             |               |              |      |      |      |
|                                    |                                |                                    |        |     |        |             |               |              |      |      |      |
|                                    |                                |                                    |        |     |        |             |               |              |      |      |      |
|                                    | Factor                         | Factor                             | Factor |     | Factor |             |               |              |      |      |      |
|                                    | 1                              | 2                                  | 3      |     | number | Eigenvalue  | % of Variance | Cumulative % |      |      |      |
| Al <sub>2</sub> O <sub>3</sub>     | 0.68                           |                                    |        |     | 1      | 4.1952      | 38.14         | 38.14        |      |      |      |
| Fe <sub>2</sub> O <sub>3</sub> (T) |                                | 0.74                               |        |     | 2      | 2.65965     | 24.18         | 62.32        |      |      |      |
| Sc                                 | 0.93                           |                                    |        |     | 3      | 1.70611     | 15.51         | 77.83        |      |      |      |
| V                                  |                                | 0.81                               |        |     | 4      | 0.901614    | 8.20          | 86.02        |      |      |      |
| Cr                                 | 0.82                           |                                    |        |     | 5      | 0.620407    | 5.64          | 91.66        |      |      |      |
| Ni                                 |                                |                                    |        |     | 6      | 0.471673    | 4.29          | 95.95        |      |      |      |
| Ga                                 |                                | -0.85                              |        |     | 7      | 0.250348    | 2.28          | 98.23        |      |      |      |
| La                                 |                                |                                    | 0.80   |     | 8      | 0.127271    | 1.16          | 99.38        |      |      |      |
| Ce                                 |                                |                                    |        |     | 9      | 0.057302    | 0.52          | 99.91        |      |      |      |
| Yb                                 |                                |                                    | 0.90   |     | 10     | 0.0102369   | 0.09          | 100.00       |      |      |      |
| Th                                 | 0.82                           |                                    |        |     | 11     | 0.000188308 | 0.00          | 100.00       |      |      |      |

## Supplementary Table 3.

## Messinian Factor Analysis

|                                    | Al <sub>2</sub> O <sub>3</sub> | Fe <sub>2</sub> O <sub>3</sub> (T) | TiO <sub>2</sub> | Sc     | V   | Cr     | Co         | Ni            | Cu           | Ga | Rb  | Zr  | Th   | ΣREE |
|------------------------------------|--------------------------------|------------------------------------|------------------|--------|-----|--------|------------|---------------|--------------|----|-----|-----|------|------|
| MP1                                | 32.66                          | 162                                | 1074             | 24     | 161 | 120    | 2          | 19            | 10           | 40 | 262 | 114 | 117  | 353  |
| MP2                                | 30.45                          | 3.69                               | 1068             | 24     | 169 | 130    | 7          | 21            | 24           | 39 | 239 | 135 | 13.5 | 131  |
| MP3                                | 26.92                          | 9.81                               | 1006             | 23     | 221 | 90     | 33         | 70            | 43           | 34 | 208 | 188 | 16.1 | 284  |
| MP4                                | 25.42                          | 7.34                               | 12               | 21     | 160 | 120    | 7          | 33            | 36           | 34 | 204 | 192 | 18.9 | 196  |
| MP5                                | 22.95                          | 8.31                               | 1065             | 21     | 151 | 80     | 11         | 54            | 34           | 30 | 176 | 221 | 18   | 286  |
| MP6                                | 22.24                          | 7.94                               | 1012             | 20     | 150 | 110    | 25         | 49            | 27           | 28 | 199 | 186 | 17.7 | 271  |
| MP7                                | 19.7                           | 9.17                               | 0.785            | 20     | 216 | 130    | 40         | 69            | 29           | 51 | 186 | 198 | 12.9 | 376  |
| MP8                                | 21.71                          | 7.98                               | 1034             | 20     | 148 | 80     | 21         | 79            | 34           | 31 | 185 | 233 | 17.5 | 286  |
| MP9                                | 19.29                          | 8.85                               | 0.701            | 20     | 208 | 120    | 21         | 67            | 30           | 51 | 195 | 191 | 13   | 288  |
| MP10                               | 218                            | 7.06                               | 1145             | 19     | 144 | 80     | 16         | 50            | 30           | 29 | 183 | 228 | 15.9 | 261  |
| MP11                               | 20.99                          | 8.17                               | 1101             | 19     | 170 | 100    | 29         | 50            | 30           | 28 | 190 | 269 | 24.3 | 424  |
| MP12                               | 2113                           | 7.98                               | 1169             | 19     | 178 | 70     | 19         | 55            | 30           | 29 | 176 | 294 | 213  | 365  |
| MP13                               | 20.51                          | 7.69                               | 1213             | 19     | 142 | 140    | 10         | 43            | 27           | 27 | 193 | 248 | 19.8 | 282  |
| MP14                               | 20.54                          | 7.67                               | 1038             | 18     | 132 | 120    | 9          | 40            | 26           | 26 | 171 | 272 | 22.5 | 372  |
| MP15                               | 2125                           | 7.17                               | 1141             | 19     | 141 | 80     | 35         | 101           | 31           | 29 | 171 | 240 | 18.7 | 381  |
| MP16                               | 2126                           | 7.64                               | 1064             | 19     | 138 | 80     | 14         | 66            | 31           | 29 | 174 | 240 | 18.5 | 308  |
| MP17                               | 17.92                          | 8.68                               | 0.803            | 17     | 156 | 90     | 20         | 55            | 30           | 24 | 162 | 217 | 13.9 | 270  |
| MP18                               | 20.14                          | 7.08                               | 1055             | 18     | 132 | 70     | 32         | 61            | 30           | 28 | 165 | 254 | 19.9 | 326  |
| MP19                               | 19.47                          | 7.35                               | 1058             | 18     | 134 | 70     | 32         | 84            | 36           | 28 | 166 | 240 | 18   | 300  |
| MP20                               | 18.94                          | 7.62                               | 1052             | 16     | 134 | 80     | 24         | 54            | 29           | 25 | 160 | 283 | 22.9 | 374  |
| MP21                               | 16.65                          | 7.72                               | 0.853            | 15     | 133 | 100    | 16         | 54            | 14           | 36 | 154 | 164 | 10.3 | 221  |
| MP22                               | 16.41                          | 4.96                               | 0.97             | 14     | 103 | 80     | 7          | 39            | 24           | 23 | 150 | 355 | 20.3 | 322  |
|                                    |                                |                                    |                  |        |     |        |            |               |              |    |     |     |      |      |
|                                    |                                |                                    |                  |        |     |        |            |               |              |    |     |     |      |      |
|                                    | Factor                         | Factor                             | Factor           | Factor |     | Factor |            |               |              |    |     |     |      |      |
|                                    | 1                              | 2                                  | 3                | 4      |     | number | Eigenvalue | % of Variance | Cumulative % |    |     |     |      |      |
| Al <sub>2</sub> O <sub>3</sub>     | 0.91                           |                                    |                  |        |     | 1      | 5.51063    | 39.36         | 39.36        |    |     |     |      |      |
| Fe <sub>2</sub> O <sub>3</sub> (T) |                                | 0.83                               |                  |        |     | 2      | 3.18648    | 22.76         | 62.12        |    |     |     |      |      |
| TiO <sub>2</sub>                   |                                |                                    | 0.86             |        |     | 3      | 2.0523     | 14.66         | 76.78        |    |     |     |      |      |
| Sc                                 | 0.97                           |                                    |                  |        |     | 4      | 1.13066    | 8.08          | 84.86        |    |     |     |      |      |
| V                                  |                                |                                    |                  |        |     | 5      | 0.924128   | 6.60          | 91.46        |    |     |     |      |      |
| Cr                                 |                                |                                    |                  |        |     | 6      | 0.393618   | 2.81          | 94.27        |    |     |     |      |      |
| Co                                 |                                | 0.79                               |                  |        |     | 7      | 0.255808   | 1.83          | 96.10        |    |     |     |      |      |
| Ni                                 |                                | 0.81                               |                  |        |     | 8      | 0.201359   | 1.44          | 97.54        |    |     |     |      |      |
| Cu                                 |                                | 0.85                               |                  |        |     | 9      | 0.161626   | 1.15          | 98.69        |    |     |     |      |      |
| Ga                                 |                                |                                    | -0.81            |        |     | 10     | 0.0837769  | 0.60          | 99.29        |    |     |     |      |      |
| Rb                                 | 0.91                           |                                    |                  |        |     | 11     | 0.0427158  | 0.31          | 99.59        |    |     |     |      |      |
| Zr                                 |                                |                                    |                  |        |     | 12     | 0.0264572  | 0.19          | 99.78        |    |     |     |      |      |
| Th                                 |                                |                                    | 0.78             |        |     | 13     | 0.0230618  | 0.17          | 99.95        |    |     |     |      |      |
| ΣREE                               |                                |                                    |                  | 0.94   |     | 14     | 0.00738997 | 0.05          | 100.00       |    |     |     |      |      |
